# Supplementary material for: Construction of a new binding manner in carboxylic acid-functionalized phosphomolybdates
Source: Royal Society of Chemistry journal article supplement (doi:10.1039/c8dt01540f), 2018-01-01
Supplement: c8dt01540f1.pdf [file c8dt01540f1.pdf]

## Electronic Supplementary Information

### Construction of a new binding manner in carboxylic acid functionalized phosphomolybdates

Jin Wang,<sup>a,b</sup> Wenjie Shi,<sup>a</sup> Shujie Li,<sup>a</sup> Qiyun Mao,<sup>a</sup> Pengtao Ma,<sup>a</sup> Jingyang Niu,<sup>\*a</sup> and Jingping Wang <sup>\*a</sup>

<sup>a</sup> Key Laboratory of Polyoxometalate Chemistry of Henan Province, Institute of Molecular and Crystal Engineering, College of Chemistry and Chemical Engineering, Henan University, Kaifeng 475004, Henan, China. E-mail: [jpwang@henu.edu.cn](mailto:jpwang@henu.edu.cn), [jyniu@henu.edu.cn](mailto:jyniu@henu.edu.cn), Fax: (+86) 37123886876.

<sup>b</sup> College of Life Science and Agronomy, ZhouKou Normal University, ZhouKou 466000, Henan, P.R. China.

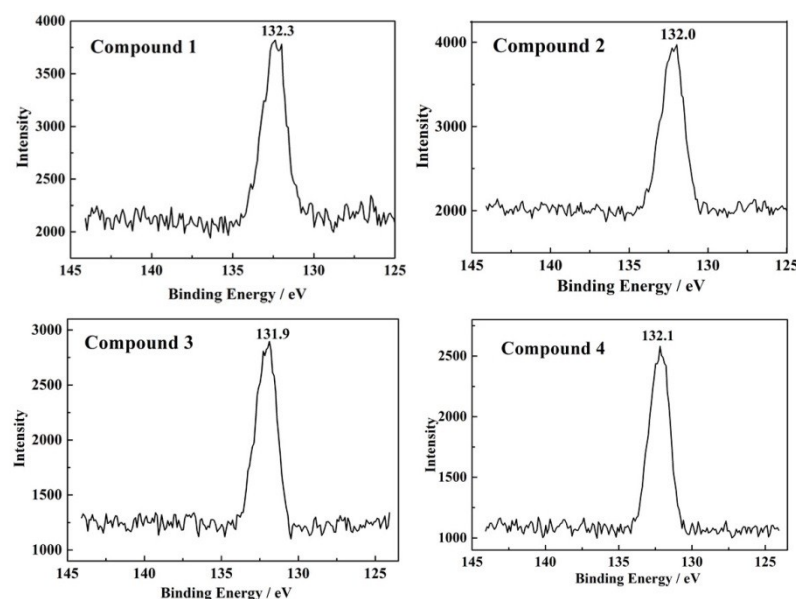

Fig. S1 XPS spectra of compounds 1–4.

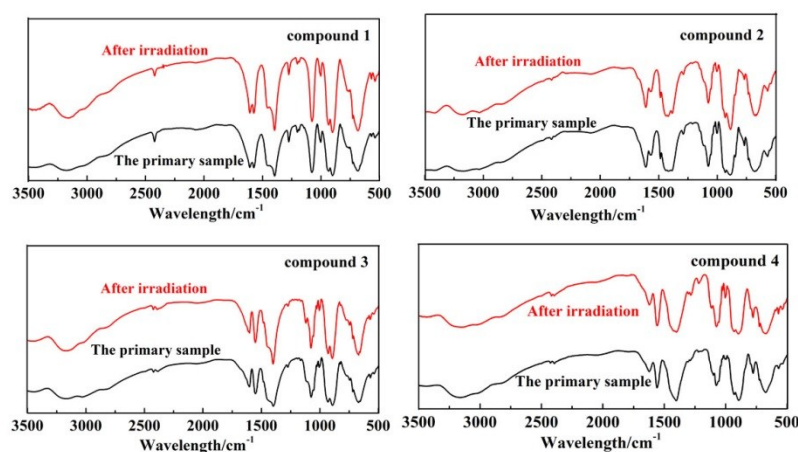

Fig. S2 IR spectra of 1–4 before and after irradiation.

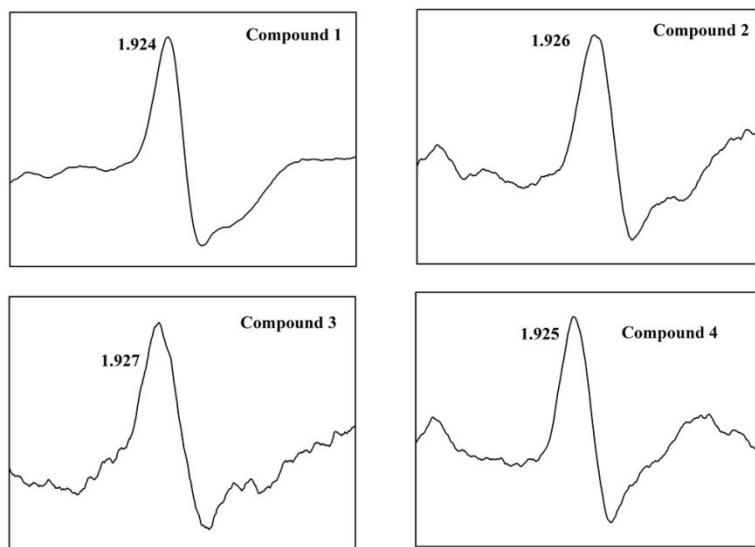

**Fig. S3** EPR spectra of compounds **1–4** after irradiation.

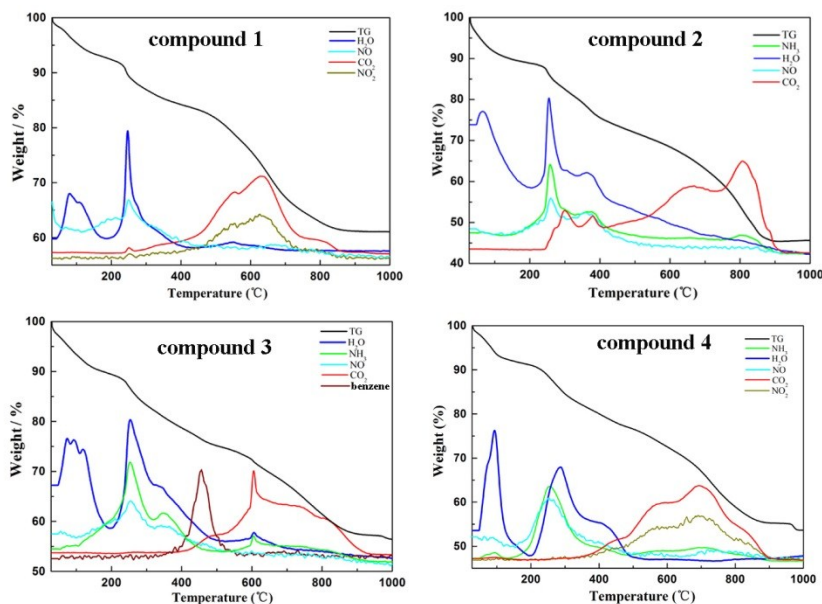

**Fig. S4** TG-MS curves of **1–4**.

### Thermogravimetric analyses

The thermal decomposition processes of compounds **1**, **2**, **3**, and **4** are quite alike. The processes can be divided into two steps. The first weight losses of 7.41% from 30 to 185 °C for **1**, 10.3% from 30 to 150 °C for **2**, 9.66% from 30 to 160 °C for **3** and 8.72% from 30 to 180 °C for **4** are assigned to the evaporation of 19, 48, 14 and 14 lattice water molecules, respectively. The second weight losses between 185–1000 °C for **1**, 150–900 °C for **2**, 160–1000 °C for **3** and **4** are attributed to the losing of ammonium ion, constitution water, carboxylic acid ligands and  $\text{P}_2\text{O}_5$ ,<sup>1</sup> also the sublimation of part of  $\text{MoO}_3$ .

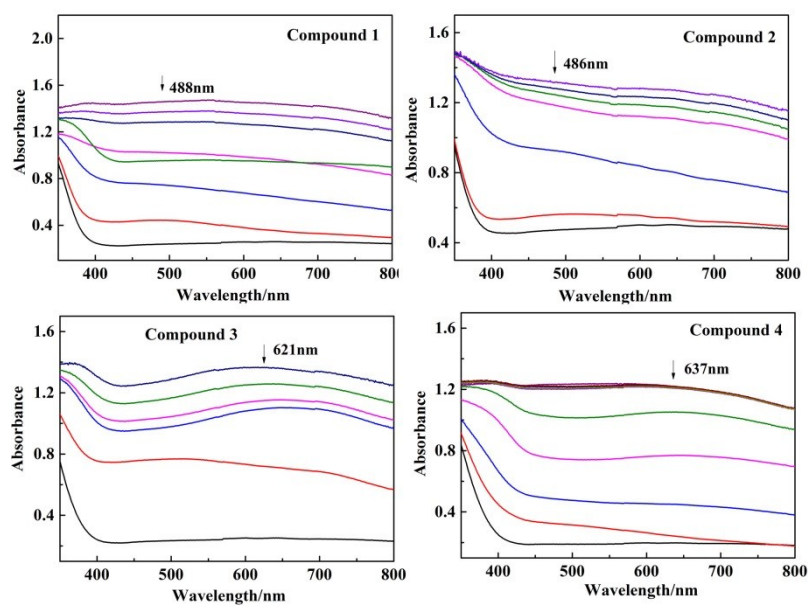

**Fig. S5** The UV-vis diffuse absorbance spectra of compounds **1–4** after being irradiated for different duration of time. The maximum absorbance wavelengths are indicated.

S1 P. Ma, R. Wan, Y. Wang, F. Hu, D. Zhang, J. Niu, J. Wang, *Inorg. Chem.*, 2016, **55**, 918.
